# Supplementary material
Source: PubMed Central journal article supplement (PMC4104903)
Supplement: 1409207111_pnas.201409207SI.pdf [file 1409207111_pnas.201409207SI.pdf]

# Supporting Information

Oliver et al. 10.1073/pnas.1409207111

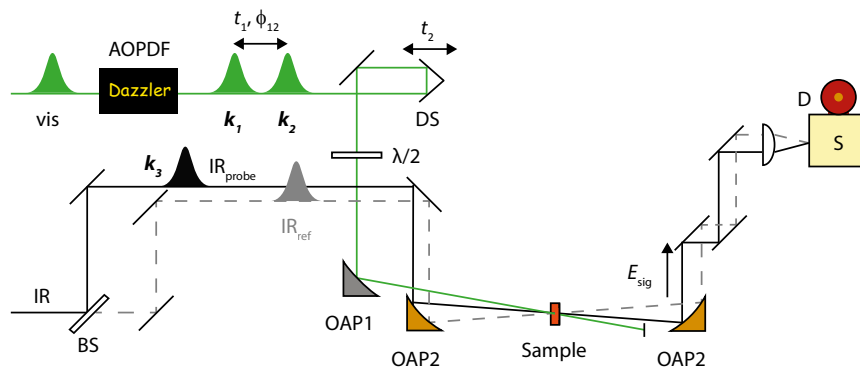

**Fig. S1.** Optical apparatus. The schematic highlights the key parts of the experimental apparatus. Legend: AOPDF, acousto-optic programmable dispersive filter; BS, 50:50 ZnSe beam splitter; D, two 64-element MCT arrays; DS, delay stage; OAP1, silver 90° off-axis parabolic mirror ( $f = 25$  cm); OAP2, gold 90° off-axis parabolic mirror ( $f = 15$  cm); S, spectrometer.

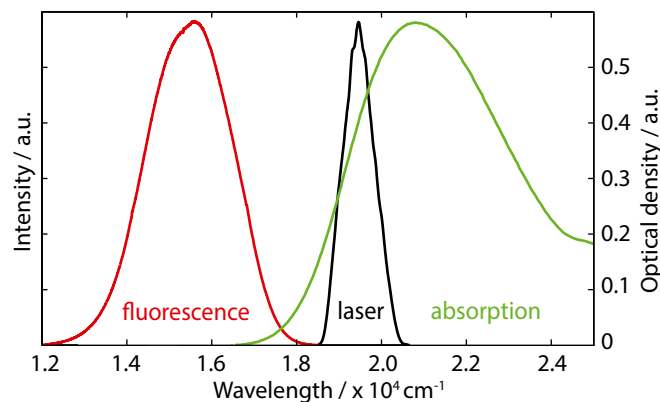

**Fig. S2.** Room temperature absorption, fluorescence, and laser spectra. The absorption spectrum of the DCM/DMSO- $d_6$  solution (250- $\mu\text{m}$  path length flow cell) used in experiments. The laser spectrum is centered at 515 nm with 30 nm of bandwidth (FWHM). The fluorescence and laser spectra are normalized to the peak the absorption intensity.
